# Supplementary material for: “CATAStrophy,” a Genome-Informed Trophic Classification of Filamentous Plant Pathogens – How Many Different Types of Filamentous Plant Pathogens Are There?
Source: Front Microbiol. 2020 Jan 21;10:3088. doi: 10.3389/fmicb.2019.03088 (PMC6986263; doi:10.3389/fmicb.2019.03088)
Supplement: DATA SHEET S2 — CAZyme annotations assigned to species via dbCAN. [file Data_Sheet_2.XLSX]

## Sheet: cazy_counts
Species	Group	AA	CBM	CE	GH	GT	PL	AA1	AA10	AA11	AA12	AA13	AA2	AA3	AA4	AA5	AA6	AA7	AA8	AA9	CBM1	CBM10	CBM11	CBM12	CBM13	CBM14	CBM15	CBM16	CBM17	CBM18	CBM19	CBM2	CBM20	CBM21	CBM22	CBM23	CBM24	CBM25	CBM26	CBM27	CBM28	CBM29	CBM3	CBM30	CBM31	CBM32	CBM34	CBM35	CBM36
Albugo candida	Oomycete	8	28	25	108	90	3	0	0	0	0	0	1	4	2	0	1	0	0	0	2	0	0	0	0	0	0	0	0	0	0	0	2	0	0	0	0	0	0	0	0	0	0	0	0	5	0	0	0
Albugo laibachii	Oomycete	38	32	32	100	85	0	2	0	0	0	0	28	2	3	0	2	1	0	0	0	0	0	0	0	0	0	0	0	0	0	0	3	0	0	0	0	1	0	0	0	0	0	0	0	3	0	0	0
Hyaloperonospora arabidopsidis	Oomycete	13	20	34	93	81	14	0	0	0	0	0	4	2	1	0	1	5	0	0	0	0	0	0	3	0	0	0	0	0	0	0	2	0	0	0	0	0	0	0	0	0	0	0	0	1	0	0	0
Phytophthora capsici 11	Oomycete	39	44	86	247	125	52	0	0	0	0	0	6	5	5	0	14	4	4	1	10	0	0	1	6	0	0	0	0	0	0	0	3	0	0	0	0	0	0	0	0	0	0	0	0	4	0	0	0
Phytophthora capsici F7	Oomycete	42	51	95	271	145	56	1	0	0	0	0	7	7	4	0	13	5	4	1	8	0	0	1	10	0	0	0	0	0	0	0	1	0	0	0	0	1	0	0	0	0	0	0	0	5	0	0	0
Phytophthora kernoviae	Oomycete	24	35	46	193	79	26	0	0	0	0	0	2	4	1	0	7	5	3	2	5	0	0	0	6	0	0	0	0	0	0	0	2	0	0	1	0	0	1	0	0	0	1	0	0	3	0	0	0
Phytophthora lateralis	Oomycete	20	36	43	170	104	22	0	1	0	0	0	1	4	0	0	8	2	4	0	6	0	0	0	7	0	0	0	0	0	0	0	3	0	0	0	1	1	0	0	0	0	0	0	0	3	0	0	0
Phytophthora parasitica	Oomycete	48	87	112	295	210	41	0	1	0	0	0	3	15	8	0	12	5	3	1	8	0	0	0	9	0	0	0	0	0	0	0	7	0	0	0	0	3	0	0	0	0	0	0	0	11	0	0	0
Phytophthora ramorum	Oomycete	40	61	89	263	131	47	0	2	0	0	0	6	5	4	0	10	6	4	3	10	0	0	0	12	0	0	0	0	1	0	0	3	0	0	0	1	1	0	0	0	0	0	0	0	4	0	0	0
Phytophthora sojae 3	Oomycete	45	61	123	285	154	63	0	1	0	0	0	6	5	2	0	11	13	5	2	12	0	0	0	10	0	0	0	0	0	0	0	3	0	0	0	0	1	0	0	0	0	0	0	0	4	0	0	0
Pythium arrhenomanes	Oomycete	22	38	73	148	116	6	0	1	1	0	0	7	2	0	0	5	1	4	1	1	0	0	0	8	0	0	0	0	0	0	1	2	0	0	0	0	2	0	0	0	0	0	0	0	4	0	0	0
Pythium irregulare	Oomycete	20	39	54	130	110	14	0	1	0	0	0	2	2	2	0	6	1	2	4	4	0	0	0	3	0	0	0	0	0	0	0	1	2	0	0	0	2	0	0	0	0	0	0	0	6	0	0	0
Pythium iwayamai	Oomycete	19	51	39	118	113	6	0	0	1	0	0	2	2	1	0	7	2	3	1	10	0	0	0	8	1	0	0	0	0	0	1	3	1	0	0	0	0	0	0	0	0	0	0	0	6	0	0	0
Pythium ultimum	Oomycete	21	47	63	160	108	29	0	0	0	0	0	2	3	3	0	9	1	2	1	5	0	0	0	5	0	0	0	0	0	0	0	2	2	0	0	0	2	0	0	0	0	0	0	0	5	0	0	0
Pythium vexans	Oomycete	20	42	52	148	111	22	0	0	0	0	0	1	5	2	0	6	3	2	1	5	0	0	0	7	0	0	0	0	0	0	0	3	0	0	0	0	3	0	0	0	0	0	0	0	5	0	0	1
Agaricus bisporus	Fungal	81	54	89	179	63	11	2	0	0	1	0	5	33	1	9	4	14	1	11	17	0	0	1	15	0	0	0	0	1	3	0	1	2	0	0	0	0	0	0	0	0	0	0	0	2	0	1	0
Heterobasidion annosum	Fungal	93	47	83	188	66	9	5	0	2	0	0	13	34	3	5	2	18	1	10	17	0	0	2	4	0	0	0	0	1	4	0	3	2	0	0	0	0	0	0	0	0	0	0	0	1	0	2	0
Magnaporthe poae	Fungal	74	68	77	224	70	6	5	0	2	3	0	3	15	2	1	3	15	4	21	10	0	0	0	2	0	0	0	0	18	0	0	3	1	0	0	2	0	0	0	0	0	0	0	0	0	0	2	0
Piriformospora indica	Fungal	66	113	77	197	68	14	1	0	2	1	0	1	9	2	8	4	12	2	24	69	0	0	0	6	0	0	1	0	1	3	0	3	2	0	0	0	0	0	0	0	0	0	0	0	2	0	2	0
Sebacina vermifera	Fungal	79	98	99	213	78	13	1	0	0	1	0	1	16	0	8	2	14	2	34	57	0	0	0	7	0	0	0	0	0	2	0	3	2	0	0	0	0	0	0	0	0	0	0	2	2	0	1	0
Gloeophyllum trabeum	Fungal	54	34	81	206	73	11	0	0	1	0	0	1	23	3	2	3	15	1	5	1	0	0	2	5	0	0	0	0	0	4	0	2	3	0	0	0	0	0	0	0	0	1	0	0	3	0	2	0
Serpula lacrymans	Fungal	41	42	78	169	65	7	2	0	2	0	0	1	13	2	3	2	9	2	5	8	0	0	1	6	0	0	0	0	1	3	0	3	2	0	0	0	0	0	0	0	0	0	0	0	2	0	2	0
Piloderma croceum	Fungal	69	40	84	169	79	7	1	0	0	0	0	2	28	0	5	2	28	2	1	0	0	0	2	10	0	0	0	1	2	4	0	3	4	0	0	0	0	0	0	0	0	0	0	0	3	0	1	0
Trametes versicolor	Fungal	97	58	99	231	95	11	1	0	2	0	0	27	23	3	9	1	11	2	18	21	0	0	1	3	0	0	0	0	1	7	0	4	2	0	0	0	0	0	0	0	0	0	0	0	3	0	2	0
Neurospora crassa	Fungal	68	54	70	197	90	4	5	0	4	3	1	6	9	3	2	1	18	2	14	20	0	0	0	3	0	0	0	0	6	0	0	4	2	0	0	5	0	0	0	0	0	0	0	0	1	0	0	0
Blumeria graminis f. sp. hordei (strain DH14)	Fungal	12	10	30	74	62	0	2	0	2	0	0	3	1	1	2	0	0	0	1	0	0	0	0	0	0	0	0	0	3	0	0	0	3	0	0	0	0	0	0	0	0	0	0	0	0	0	0	0
Blumeria graminis fsp tritici	Fungal	11	9	30	71	63	0	2	0	2	0	0	2	1	1	1	0	1	0	1	0	0	0	0	0	0	0	0	0	3	0	0	1	2	0	0	0	0	0	0	0	0	0	0	0	0	0	0	0
Debaryomyces hansenii	Fungal	11	11	19	76	71	1	2	0	0	0	0	2	1	2	0	3	1	0	0	0	0	0	0	0	0	0	0	0	2	0	0	0	2	0	1	0	0	0	0	0	0	0	0	0	0	0	0	0
Erysiphe necator	Fungal	11	10	30	66	59	0	1	0	0	0	0	3	1	0	2	0	3	0	1	0	0	0	0	0	0	0	0	0	4	0	0	1	1	0	0	0	0	0	0	0	0	0	0	0	1	0	0	0
Komagataella pastoris	Fungal	9	11	14	41	60	1	2	0	0	0	0	2	2	1	0	1	1	0	0	2	0	0	0	0	0	0	0	0	1	0	0	1	2	0	0	0	0	0	0	0	0	0	0	0	1	0	0	0
Puccinia striformis	Fungal	23	14	63	147	82	2	1	0	0	0	0	2	4	2	5	1	5	0	3	0	0	0	1	0	0	0	0	0	0	0	0	0	1	0	0	0	0	0	0	0	0	0	0	0	1	0	0	0
Saccharomyces cerevisiae	Fungal	9	10	12	58	67	0	1	0	0	0	0	1	0	3	0	3	1	0	0	0	0	0	0	0	0	0	0	0	1	1	0	0	4	0	0	0	0	0	0	0	0	0	0	0	1	0	0	0
Schizosaccharomyces pombe	Fungal	4	5	15	56	61	0	1	0	0	0	0	0	0	1	0	1	1	0	0	1	0	0	0	0	0	0	0	0	0	0	0	0	0	0	1	0	0	0	0	0	0	0	0	0	0	0	0	0
Tremella mesenterica	Fungal	13	21	29	73	80	3	3	0	1	0	0	2	2	0	2	1	2	0	0	0	0	0	1	10	0	0	0	0	1	0	0	1	2	0	0	0	0	0	0	0	0	1	0	0	1	0	0	0
Tuber melanosporum	Fungal	32	22	33	89	59	3	1	0	9	1	0	1	4	1	1	1	10	1	2	3	0	0	0	0	0	0	0	0	8	0	0	0	2	0	0	0	0	0	0	0	0	0	0	0	2	0	0	0
Ustilaginoidea virens	Fungal	59	32	71	240	154	0	4	0	4	1	0	11	13	6	2	2	12	2	2	2	0	0	0	0	0	0	0	0	8	1	0	3	2	0	0	0	0	0	0	0	0	0	0	0	0	0	0	0
Ustilago maydis	Fungal	59	32	71	240	154	0	4	0	4	1	0	11	13	6	2	2	12	2	2	2	0	0	0	0	0	0	0	0	8	1	0	3	2	0	0	0	0	0	0	0	0	0	0	0	0	0	0	0
Aciculosporium take A7993	Fungal	31	15	37	126	81	0	1	0	3	1	0	3	7	3	2	2	7	1	1	2	0	0	0	0	0	0	0	0	3	1	0	2	1	0	0	0	0	0	0	0	0	0	0	0	0	0	0	0
Epichloë amarillans E57	Fungal	35	17	48	128	76	0	1	0	4	1	0	3	11	2	2	1	9	0	1	0	0	0	0	1	0	0	0	0	1	1	0	2	1	0	0	0	0	0	0	0	0	0	0	0	0	0	0	0
Epichloë brachyelytri E4804	Fungal	37	27	50	130	85	0	2	0	5	1	0	3	9	2	2	1	11	0	1	0	0	0	0	1	0	0	0	0	6	1	0	2	1	0	0	1	0	0	0	0	0	0	0	0	0	0	0	0
Epichloë elymi E56	Fungal	34	17	42	126	82	1	1	0	3	0	0	3	10	2	2	1	11	0	1	0	0	0	0	1	0	0	0	0	3	1	0	2	1	0	0	0	0	0	0	0	0	0	0	0	0	0	0	0
Epichloë festucae E2368	Fungal	36	28	45	143	92	0	1	0	4	0	0	3	10	3	3	1	10	0	1	0	0	0	0	1	0	0	0	0	5	1	0	2	1	0	0	1	0	0	0	0	0	0	0	0	0	0	0	0
Epichloë festucae E894	Fungal	31	35	45	137	79	0	1	0	4	0	0	4	9	2	2	1	7	0	1	0	0	0	0	1	0	0	0	0	11	1	0	2	1	0	0	1	0	0	0	0	0	0	0	0	0	0	0	0
Epichloë typhina E8	Fungal	31	26	46	130	82	0	2	0	3	1	0	3	10	2	2	1	6	0	1	0	0	0	0	1	0	0	0	0	5	1	0	2	1	0	0	1	0	0	0	0	0	0	0	0	0	0	0	0
Epichloë typhina subsp. Poae E5819	Fungal	38	26	49	128	86	0	2	0	3	1	0	3	12	2	2	1	11	0	1	0	0	0	0	1	0	0	0	0	4	1	0	2	1	0	0	1	0	0	0	0	0	0	0	0	1	0	0	0
Pisolithus microcarpus	Fungal	22	24	44	90	72	5	2	0	0	0	1	1	3	2	4	1	4	0	4	0	0	0	1	8	0	0	0	0	0	1	0	1	2	0	0	0	0	0	0	0	0	0	0	0	1	0	0	0
Pisolithus tinctorius	Fungal	26	19	58	86	70	3	1	0	0	0	0	1	5	1	4	2	8	0	4	0	0	0	1	3	0	0	0	0	1	2	0	2	1	0	0	0	0	1	0	0	0	0	0	0	1	0	0	0
Sporisorium reilianum SRZ2	Fungal	28	10	56	112	56	3	4	1	0	0	0	3	9	1	3	1	6	0	0	0	0	0	0	0	0	0	0	0	1	0	0	0	1	0	0	0	0	0	0	0	0	0	0	0	1	0	1	0
Uncinocarpus reesii	Fungal	22	22	32	81	69	0	0	0	3	1	0	3	3	2	2	1	7	0	0	0	0	0	0	0	0	0	0	0	7	0	0	2	2	0	0	0	0	0	0	0	0	0	0	0	0	0	0	0
Ustilago hordei	Fungal	25	10	45	102	57	3	3	1	0	0	0	3	8	1	2	1	6	0	0	0	0	0	0	0	0	0	0	0	1	0	0	0	1	0	0	0	0	0	0	0	0	0	0	0	1	0	0	0
Puccinia triticina	Fungal	23	13	53	133	72	3	1	0	0	0	0	3	7	1	5	1	4	0	1	0	0	0	1	1	0	0	0	0	0	0	0	0	0	0	0	0	0	0	0	0	0	0	0	0	0	0	1	0
Taphrina deformans	Fungal	12	9	30	67	49	0	0	0	1	0	0	2	1	2	0	0	5	0	1	0	0	0	0	0	0	0	0	0	0	1	0	1	1	0	0	0	0	0	0	0	0	0	0	0	1	0	0	0
Melampsora laricis-populina	Fungal	38	23	104	178	87	7	2	0	0	0	0	2	8	1	4	2	15	0	4	0	0	0	1	0	0	0	0	0	0	4	1	0	1	0	0	0	0	0	0	0	0	0	0	0	1	0	3	0
Puccinia graminis UG99	Fungal	39	17	98	184	118	8	4	0	0	0	0	2	9	0	4	2	14	0	4	0	0	0	1	1	0	0	0	0	0	0	0	1	1	0	0	0	0	0	0	0	0	0	0	0	1	0	0	0
Laccaria bicolor	Fungal	42	31	65	175	77	7	0	0	2	0	0	3	10	0	10	2	10	0	5	1	0	0	2	11	0	0	0	0	1	1	0	1	2	0	0	0	0	0	0	0	0	0	0	0	1	0	0	0
Moniliophthora perniciosa	Fungal	46	32	51	145	34	12	1	0	1	0	0	5	9	0	0	1	13	1	15	5	0	0	1	3	0	0	0	0	2	1	0	3	1	0	0	0	0	0	0	0	0	0	0	0	2	0	0	0
Rhizophagus irregularis (syn. Glomus intraradices)	Fungal	27	65	61	41	121	1	2	0	3	0	0	2	4	0	5	1	10	0	0	0	1	0	0	21	0	0	0	2	2	3	0	16	1	0	0	0	0	0	1	0	2	0	0	0	2	0	0	0
Epichloe glyceriae E277	Fungal	38	89	114	343	112	11	0	2	5	0	0	3	12	3	2	1	9	0	1	0	0	0	1	4	0	0	1	0	2	0	0	3	1	1	1	0	0	0	0	0	0	0	1	0	15	2	3	0
Dothistroma septosporum	Fungal	57	28	93	206	113	5	4	0	5	1	0	4	20	2	3	1	13	2	2	1	0	0	0	1	1	0	0	0	5	4	0	4	1	0	0	0	0	0	0	0	0	0	0	0	0	0	1	0
Zymoseptoria brevis	Fungal	56	30	90	199	106	3	7	0	5	1	0	3	20	1	1	1	15	1	1	1	0	0	0	0	0	0	1	0	7	2	0	4	1	0	0	0	0	0	0	0	0	0	0	0	0	0	1	0
Zymoseptoria pseudotritici	Fungal	56	31	97	208	107	3	5	0	5	1	0	4	17	1	0	2	18	1	2	0	0	0	0	0	0	0	0	0	6	3	0	4	1	0	0	0	0	0	0	0	0	0	0	0	1	0	1	0
Zymoseptoria tritici	Fungal	55	23	87	194	104	3	3	0	5	1	0	4	18	1	1	2	17	1	2	0	0	0	0	0	0	0	0	0	5	0	0	4	1	1	0	0	0	0	0	0	0	0	0	0	0	0	1	0
Aspergillus fumigatus	Fungal	61	62	99	278	107	15	1	0	4	0	0	3	11	5	1	2	25	2	7	17	1	0	0	1	1	0	0	0	6	1	0	5	1	0	0	4	0	0	0	0	0	0	0	0	1	0	1	0
Mycosphaerella fijiensis	Fungal	64	29	111	242	106	6	3	0	5	1	0	3	19	2	2	2	22	2	3	1	0	0	0	0	1	0	0	0	4	1	0	4	1	0	0	0	0	0	0	0	0	0	0	0	1	0	1	0
Passalora fulva	Fungal	70	42	117	280	106	10	4	0	5	2	0	5	21	1	3	1	24	2	2	0	0	0	0	2	1	0	0	0	7	6	0	5	1	0	0	0	0	0	0	0	0	0	0	0	2	0	1	0
Alternaria brassicicola	Fungal	96	52	102	227	88	24	2	0	4	3	1	7	14	2	3	2	33	3	22	9	0	0	0	2	0	0	0	0	13	3	0	3	1	0	0	1	0	0	0	0	0	0	0	0	1	0	2	0
Gaeumannomyces graminis	Fungal	110	75	105	268	91	6	3	0	7	5	0	9	20	3	3	1	31	3	25	17	0	0	0	1	0	0	0	0	18	1	0	3	1	0	0	2	0	0	0	0	0	0	0	0	0	0	3	0
Magnaporthe oryzae	Fungal	108	76	125	264	100	5	3	0	7	4	1	9	19	1	5	1	31	5	22	18	0	0	0	2	0	0	0	0	25	2	0	4	1	0	1	0	0	0	0	0	0	0	0	0	1	0	2	0
Trichoderma virens	Fungal	84	87	111	284	98	6	4	0	4	1	0	7	20	3	1	1	40	0	3	24	0	0	0	8	0	0	0	0	17	0	0	2	1	0	0	3	0	0	0	0	0	0	0	0	1	0	0	0
Fusarium avenaceae	Fungal	68	45	92	167	36	12	1	0	1	1	0	3	13	4	3	1	30	4	7	6	0	0	0	1	0	0	3	0	16	1	0	1	0	2	0	0	0	0	0	0	0	0	0	0	0	0	0	0
Sclerotinia sclerotiorum	Fungal	75	64	93	226	89	5	6	0	2	1	1	3	20	3	3	1	22	4	9	19	0	0	0	3	0	0	0	1	12	0	0	5	1	0	0	6	0	0	0	0	0	0	0	0	0	0	1	0
Leptosphaeria maculans	Fungal	80	69	89	202	74	46	2	0	2	0	0	2	17	0	5	2	17	2	31	24	0	0	1	25	1	0	0	0	0	0	0	4	1	0	0	1	0	0	0	0	0	0	0	0	0	0	1	0
Rhizoctonia solani AG8	Fungal	80	69	89	202	74	46	2	0	2	0	0	2	17	0	5	2	17	2	31	24	0	0	1	25	1	0	0	0	0	0	0	4	1	0	0	1	0	0	0	0	0	0	0	0	0	0	1	0
Sclerotinia borealis	Fungal	90	56	94	221	95	9	7	0	3	1	0	4	24	4	3	2	32	4	6	17	0	0	0	3	0	0	0	0	8	0	1	4	1	0	0	7	0	0	0	0	0	0	0	0	2	0	1	0
Verticillium albo-atrum	Fungal	96	63	95	271	86	36	3	0	2	3	1	8	25	2	2	1	25	4	20	22	0	0	0	1	0	0	0	0	9	0	0	5	1	0	0	2	0	0	0	0	0	0	0	0	0	0	3	0
Verticillium dahliae	Fungal	102	66	108	270	92	35	3	0	2	3	1	8	24	0	2	1	29	2	27	28	0	0	0	1	0	0	0	0	10	0	0	5	0	0	0	2	0	0	0	0	0	0	0	0	0	0	3	0
Colletotrichum graminicola	Fungal	130	73	127	292	101	16	7	0	3	3	1	11	30	4	4	1	34	4	28	19	0	0	0	1	0	0	0	0	13	0	0	4	1	0	0	5	0	0	0	0	0	0	0	0	1	0	4	0
Cochliobolus sativus	Fungal	125	66	125	262	99	16	3	0	9	3	1	9	25	3	4	2	39	3	24	11	0	0	0	1	0	0	0	0	15	2	0	2	1	0	0	0	0	0	0	0	0	0	0	0	1	1	4	0
Armillaria mellea	Fungal	124	48	117	259	80	23	4	0	1	0	0	12	48	2	4	3	26	3	21	11	0	1	1	8	0	0	0	0	0	0	0	3	2	1	0	0	0	0	0	0	0	0	0	0	0	0	1	0
Aspergillus nidulans	Fungal	89	63	110	273	94	21	2	0	2	0	2	3	25	5	0	1	38	1	10	6	0	0	0	0	1	0	0	0	12	0	0	4	1	1	0	1	0	0	0	0	0	0	0	0	0	0	1	0
Botrytis cinerea B05	Fungal	86	58	107	243	101	12	5	0	2	0	1	4	25	3	5	1	26	4	10	17	0	0	0	2	0	0	0	0	9	0	0	4	1	0	0	7	0	0	0	0	0	0	0	0	2	0	2	0
Botrytis cinerea BcDW1	Fungal	101	64	126	252	106	12	6	0	2	0	1	4	31	4	6	1	32	4	10	19	0	0	0	3	0	0	0	0	8	0	0	5	1	0	0	7	0	0	0	0	0	0	0	0	1	0	2	0
Botrytis cinerea T4	Fungal	93	62	117	243	101	11	5	0	2	0	1	4	27	3	6	1	31	4	9	17	0	0	0	2	0	0	0	0	9	0	0	4	1	0	0	8	0	0	0	0	0	0	0	0	1	0	2	0
Colletotrichum higginsianum	Fungal	123	71	135	309	110	41	7	0	3	5	1	12	27	5	3	1	33	2	24	16	0	0	0	1	0	0	0	0	15	0	0	5	1	0	0	5	0	0	0	0	0	0	0	0	0	0	2	0
Rhizoctonia solani AG1-IA	Fungal	139	113	115	321	94	90	3	0	2	5	0	2	38	2	12	3	29	5	38	40	0	0	3	28	0	0	0	0	1	0	0	6	6	0	0	0	0	0	0	0	0	0	0	0	0	0	2	0
Fusarium graminearum	Fungal	106	65	126	260	101	21	6	0	5	2	1	6	20	4	5	2	37	5	13	11	0	0	0	2	0	0	4	0	11	0	0	2	2	3	0	2	0	0	0	0	0	0	0	0	2	0	2	0
Macrophomina phaseolina	Fungal	114	54	139	279	105	25	3	0	8	0	0	9	34	4	2	1	39	2	12	5	0	0	0	0	0	0	0	0	11	5	0	2	1	2	0	0	0	0	0	0	0	0	0	0	3	0	2	0
Sphaerobolus stellatus	Fungal	266	163	196	342	119	10	1	0	0	0	0	53	95	3	6	5	56	1	46	61	0	0	3	36	0	0	0	0	3	4	0	3	2	1	0	0	0	0	0	0	0	0	0	0	2	0	4	1
Cochliobolus carbonum	Fungal	130	64	128	267	95	15	5	0	5	3	1	9	27	5	5	2	41	3	24	12	0	0	0	2	0	0	0	0	14	3	0	2	1	0	0	0	0	0	0	0	0	0	0	0	2	1	4	0
Cochliobolus heterostrophus C4	Fungal	136	66	127	267	98	16	5	0	9	3	1	9	29	4	4	1	43	4	24	10	0	0	0	2	0	0	1	0	15	3	0	2	1	0	0	0	0	0	0	0	0	0	0	0	1	0	4	0
Cochliobolus heterstrophus C5	Fungal	145	67	135	282	102	16	5	0	13	3	1	9	29	4	4	1	47	4	25	11	0	0	0	2	0	0	1	0	14	4	0	2	1	0	0	0	0	0	0	0	0	0	0	0	1	0	4	0
Cochliobolus miyabeanus	Fungal	131	58	124	264	97	15	6	0	6	3	1	9	25	4	6	2	39	4	26	11	0	0	0	3	0	0	0	0	12	3	0	2	1	0	0	0	0	0	0	0	0	0	0	0	1	1	4	0
Cochliobolus victoriae	Fungal	130	68	131	271	95	15	5	0	6	3	1	9	26	3	5	2	42	4	24	11	0	0	0	2	0	0	1	0	16	3	0	2	1	0	0	0	0	0	0	0	0	0	0	0	1	1	4	0
Eutypa lata	Fungal	183	46	115	344	102	25	3	0	8	3	1	10	43	3	2	1	65	6	38	4	0	0	0	2	0	0	1	0	10	0	0	2	1	0	0	2	0	0	0	0	0	0	0	0	1	0	2	0
Parastagonospora nodorum	Fungal	128	51	125	258	92	10	2	0	5	3	1	7	29	4	3	1	41	4	28	10	0	0	0	2	0	0	2	0	13	1	0	3	1	1	0	0	0	0	0	0	0	0	0	0	1	0	2	0
Pyrenophora teres teres	Fungal	114	48	115	244	99	10	3	0	6	2	1	6	20	2	5	1	39	3	26	10	0	0	0	1	0	0	1	0	9	2	0	3	1	0	0	0	0	0	0	0	0	0	0	0	1	0	3	0
Pyrenophora tritici-repentis	Fungal	118	44	107	242	96	10	5	0	4	2	1	7	23	3	4	1	40	3	25	10	0	0	0	0	0	0	0	0	7	3	0	3	1	0	0	0	0	0	0	0	0	0	0	0	1	0	3	0
Setosphaeria turcica	Fungal	126	55	119	249	96	14	4	0	9	3	1	8	24	3	4	1	40	3	26	10	0	0	0	3	0	0	1	0	8	3	0	2	1	0	0	0	0	0	0	0	0	0	0	0	1	0	4	0
Colletotrichum orbiculare	Fungal	152	81	157	358	114	47	6	0	4	3	1	12	34	6	3	1	50	4	28	21	0	0	0	2	0	0	0	0	14	1	0	5	1	0	0	3	0	0	0	0	0	0	0	0	0	0	5	0
Moniliophthora roreri	Fungal	176	59	173	364	90	20	6	0	1	1	0	16	59	4	7	1	54	2	25	20	0	0	1	8	0	0	0	0	3	1	0	3	3	1	0	0	0	0	0	0	0	0	0	0	2	0	2	0
Colletotrichum gloeosporioides	Fungal	200	97	200	436	113	45	8	0	5	3	1	13	49	7	3	2	77	4	28	18	0	0	0	3	0	0	1	0	14	0	0	4	1	0	0	5	0	0	0	0	0	0	0	0	1	0	7	0
Fusarium fujikuroi	Fungal	115	66	182	310	106	21	7	0	5	1	1	6	24	5	4	2	42	5	13	11	0	0	0	4	0	0	2	0	10	1	0	2	2	1	0	1	0	0	0	0	0	0	0	0	0	0	2	1
Fusarium oxysporum fsp cubense race 1	Fungal	120	80	173	368	114	25	6	0	5	2	1	7	25	5	4	1	47	4	13	13	0	0	0	2	0	0	4	0	12	2	0	2	1	3	0	2	0	0	0	0	0	0	0	0	1	0	3	0
Fusarium oxysporum fsp cubense race 4	Fungal	120	81	168	324	98	25	6	0	6	2	1	9	22	2	4	1	45	5	17	14	0	0	0	2	0	0	4	0	12	2	0	2	2	1	0	2	0	0	0	0	0	0	0	0	1	0	3	0
Fusarium oxysporum fsp cubense tropical race 4	Fungal	141	103	208	421	163	28	7	0	5	4	1	8	29	6	5	1	55	5	15	18	0	0	0	1	0	0	5	0	13	2	0	2	9	2	0	2	0	0	0	0	0	0	0	0	1	0	3	0
Fusarium oxysporum fsp lycopersici	Fungal	143	97	171	376	120	25	8	0	4	3	1	9	31	4	5	1	56	5	16	13	0	0	2	2	0	0	2	0	15	1	0	2	10	5	0	2	0	0	0	0	0	0	0	0	1	0	3	0
Fusarium oxysporum fsp melonis	Fungal	158	126	221	489	189	28	7	0	5	4	2	9	34	8	6	1	62	5	15	14	0	0	1	2	0	0	2	0	16	2	0	3	13	4	0	2	0	0	0	0	0	0	0	0	2	0	4	0
Fusarium psuedograminearum	Fungal	204	128	238	504	198	42	10	0	10	4	0	12	36	8	10	4	74	10	26	24	0	0	0	2	0	0	10	0	24	2	0	4	2	2	0	4	0	0	0	0	0	0	0	0	4	0	4	0
Fusarium solani	Fungal	133	81	198	369	115	36	4	0	6	1	1	4	33	11	3	1	54	3	12	12	0	0	0	3	0	0	2	0	17	1	0	2	2	0	0	3	0	0	0	0	0	0	0	0	2	0	2	0
Fusarium verticilliodes	Fungal	109	78	160	313	103	23	4	0	4	3	1	6	25	4	4	2	38	5	13	13	0	0	0	2	0	0	3	0	16	2	0	2	1	1	0	1	0	0	0	0	0	0	0	0	2	0	3	0
Oidiodendron maius	Fungal	111	95	207	522	135	19	9	0	5	1	0	6	25	3	4	3	46	1	8	35	0	0	0	3	0	0	0	0	7	1	1	4	1	0	0	5	0	0	0	0	0	0	0	0	4	0	1	0
[truncated: 318 more columns]
