# Supplementary material for: “CATAStrophy,” a Genome-Informed Trophic Classification of Filamentous Plant Pathogens – How Many Different Types of Filamentous Plant Pathogens Are There?
Source: Front Microbiol. 2020 Jan 21;10:3088. doi: 10.3389/fmicb.2019.03088 (PMC6986263; doi:10.3389/fmicb.2019.03088)
Supplement: DATA SHEET S3 — Plot and PCA coordinates for the first 16 principle components derived from CAZyme gene contents for 110 fungal and oomycete species and isolates used to build the CATAStrophy RCD predictive method. [file Data_Sheet_3.XLSX]

## Sheet: Initial Assignment
																										Species	Assigned from nomenclature1(literature-derived)	Assigned from nomenclature2(novel major class)	Assigned from nomenclature3(novel sub-class)	pc01	pc02	pc03	pc04	pc05	pc06	pc07	pc08	pc09	pc10	pc11	pc12	pc13	pc14	pc15	pc16
																										Albugo laibachii	biotroph	monomertroph	monomertroph - haustorial	-47.308	3.20685	-2.50999	0.337058	-6.67816	16.2774	1.51623	-7.39603	-15.9875	12.0898	0.396512	6.15905	3.62902	6.2486	12.0326	1.8996
																										Blumeria graminis fsp tritici	biotroph	monomertroph	monomertroph - haustorial	-48.5896	-11.5881	-8.26199	-1.76676	3.20766	-1.78836	-1.32561	-2.50493	-4.01484	0.607747	-0.84788	-1.44445	-1.10884	0.284851	0.840936	-1.74948
																										Erysiphe necator	biotroph	monomertroph	monomertroph - haustorial	-46.6963	-11.51	-8.67161	-1.20457	2.37261	-0.912222	-2.6351	-3.26616	-3.43647	-0.45854	-1.31343	-1.20815	-1.62013	0.083834	0.244608	-1.6794
																										Hyaloperonospora arabidopsidis	biotroph	monomertroph	monomertroph - haustorial	-50.3488	12.5448	0.0641427	1.15727	-4.47501	-1.24448	-4.72635	3.20996	-7.61859	4.1096	-0.722791	-0.701665	-0.900617	-1.70042	1.17846	0.34626
																										Melampsora laricis-populina	biotroph	monomertroph	monomertroph - haustorial	-18.8962	-11.1807	-1.97392	-6.91277	-6.06479	-13.2992	-0.121987	-4.534	1.539	4.99868	28.6635	-2.42609	-1.36025	0.166815	-1.53708	-0.758371
																										Phytophthora capsici	biotroph	monomertroph	monomertroph - haustorial	-27.0328	59.202	10.9668	-0.785767	-2.22685	-3.12041	-0.412314	-1.80337	1.0055	3.25344	0.212422	-2.54564	-1.29393	4.83732	-2.1618	-4.20392
																										Phytophthora sojae	biotroph	monomertroph	monomertroph - haustorial	-13.5928	75.7981	17.1584	2.79515	-5.2012	-6.15793	0.722126	-7.00717	5.44369	-1.33617	1.73902	-1.88637	0.247689	1.72711	-5.8535	-4.21395
																										Phytophthora kernoviae	biotroph	monomertroph	monomertroph - haustorial	-41.0483	29.6032	4.15357	1.67684	-1.09707	-1.26171	-3.42	3.96769	-0.606613	4.47356	-3.97243	-1.41442	-4.49177	0.733648	1.99021	-1.40441
																										Phytophthora lateralis	biotroph	monomertroph	monomertroph - haustorial	-45.664	37.475	8.52294	0.57216	-2.66269	-0.259988	-4.25256	1.6743	-0.100352	5.17851	-2.22896	-1.44262	-2.62521	-2.33673	-3.19136	-1.46892
																										Phytophthora parasitica	biotroph	monomertroph	monomertroph - haustorial	-18.3566	74.2321	10.0088	0.0785165	-7.0548	6.68318	7.857	-0.561828	5.56267	-4.13306	3.56608	-2.71245	-0.616848	-6.32169	1.85536	4.54213
																										Puccinia graminis	biotroph	monomertroph	monomertroph - haustorial	-17.2586	-11.671	-5.71084	-5.73876	-5.72806	-9.43549	1.19072	-5.25419	1.64499	7.45012	29.7864	-0.0587027	1.12585	-7.16533	1.20198	-1.27296
																										Puccinia triticina	biotroph	monomertroph	monomertroph - haustorial	-42.1415	-13.814	-2.22073	-3.37808	-2.19851	-8.69728	4.35689	-4.47698	-1.28958	10.0423	18.0526	-2.18312	0.504756	-2.46806	0.215686	-2.00583
																										Puccinia striformis	biotroph	monomertroph	monomertroph - haustorial	-40.0131	-13.2639	0.264975	-0.157489	-4.78354	-8.83366	5.12028	-4.79113	1.02362	5.81352	21.1733	-2.47466	-2.58779	-2.03746	-0.325657	-1.41486
																										Pythium arrhenomanes	biotroph	monomertroph	monomertroph - haustorial	-37.6283	22.4677	-3.01962	-1.7688	-4.00302	10.2828	-4.63034	3.27147	-6.01537	-4.79911	5.35747	6.79438	5.08048	-2.79602	7.48429	1.90067
																										Pythium irregulare	biotroph	monomertroph	monomertroph - haustorial	-42.2294	20.1587	-0.945222	2.1357	-1.16892	7.70135	-5.22091	6.21923	-4.14901	-3.77595	2.54756	2.78404	4.50356	-3.1222	7.59636	3.08997
																										Pythium iwayamai	biotroph	monomertroph	monomertroph - haustorial	-45.8769	17.3453	2.66513	-0.352647	3.00815	9.46209	-3.72009	4.86743	-5.28076	-1.20057	-0.342089	3.2752	3.52874	-8.70907	4.71889	3.21797
																										Pythium vexans	biotroph	monomertroph	monomertroph - haustorial	-40.2386	28.4078	0.973671	-0.989688	-0.578724	4.50478	-1.86942	5.59963	-3.30136	-2.47581	-1.96091	-0.390238	0.763549	-5.03525	2.94751	4.06539
																										Sporisorium reilianum	biotroph	monomertroph	monomertroph - haustorial	-33.4778	-8.80285	-6.95547	-9.274	-1.30843	-1.12653	-0.947204	5.27676	-2.03311	-3.09772	0.887694	-2.90418	-3.91143	2.74205	-1.67717	-0.0905045
																										Tremella mesenterica	biotroph	monomertroph	monomertroph - haustorial	-49.0606	-11.3117	-3.03946	-4.09718	1.18532	-3.70688	-0.552267	2.80352	-2.6489	-0.126008	-0.41315	6.18396	2.23042	-1.30697	-6.61741	0.542412
																										Blumeria graminis f. sp. hordei	biotroph	monomertroph	monomertroph - haustorial	-48.5783	-11.5161	-8.43502	-1.7229	3.14504	-1.03027	-0.672613	-3.06931	-3.1448	0.264193	-0.813038	-1.30725	-1.13326	0.523371	1.83052	-1.87056
																										Albugo candida	biotroph	monomertroph	monomertroph - haustorial	-55.2165	8.31405	-2.1452	2.38675	-0.937964	2.28758	-3.34268	-1.76574	-4.40714	3.02183	-0.574113	3.95551	-1.83187	-1.82685	10.3396	3.46398
																										Phytophthora ramorum	biotroph	monomertroph	monomertroph - haustorial	-23.3637	62.5022	13.5393	0.448615	-5.22594	0.535692	1.01393	0.467228	1.64421	0.0945938	0.276738	-2.88723	2.2094	1.83715	-3.53871	-1.65366
																										Pythium ultimum	biotroph	monomertroph	monomertroph - haustorial	-40.5183	30.4299	2.12203	0.633944	-2.12304	6.11673	-1.16757	8.04311	-3.26313	-4.81727	2.27245	-0.124543	4.40065	-2.9201	4.94	3.87201
																										Passalora fulva	biotroph	monomertroph	monomertroph - non-haustorial	9.76516	1.87927	-14.9763	-2.40985	-6.14889	0.346442	-3.09122	-2.27621	13.8415	-4.44854	-1.25488	6.68742	-2.97141	6.62558	-3.66737	-1.20869
																										Magnaporthe poae	biotroph	monomertroph	monomertroph - non-haustorial	-11.1718	-10.8391	2.00856	19.2419	5.8518	2.73753	2.0165	-3.4316	-2.19904	5.21817	-0.0856737	-2.41654	7.55982	8.26743	1.3569	6.46775
																										Taphrina deformans	biotroph	monomertroph	monomertroph - non-haustorial	-46.0294	-10.6375	-7.40143	-4.68542	2.16094	-3.98476	-7.9344	1.08437	-4.96412	0.572739	-3.60608	-1.4728	-1.548	1.55053	-0.995713	-2.55464
																										Ustilaginoidea virens	biotroph	monomertroph	monomertroph - non-haustorial	-9.82704	-4.19024	-15.5707	-0.00692105	3.90803	8.05881	19.6593	-22.9329	4.84361	-6.96506	-1.79281	0.437704	1.23485	-2.3767	2.95655	-3.43874
																										Ustilago maydis	biotroph	monomertroph	monomertroph - non-haustorial	-9.82704	-4.19024	-15.5707	-0.00692105	3.90803	8.05881	19.6593	-22.9329	4.84361	-6.96506	-1.79281	0.437704	1.23485	-2.3767	2.95655	-3.43874
																										Ustilago hordei	biotroph	monomertroph	monomertroph - non-haustorial	-37.1956	-9.3139	-7.06237	-7.57027	-0.281819	-1.18121	-1.97831	3.70554	-3.35408	-2.66545	-0.258525	-2.0266	-2.75425	2.64975	-1.29985	0.513908
																										Epichloe amarillans	symbiont	monomertroph	monomertroph - symbiont	-29.8557	-8.37812	-11.1005	-2.89109	1.08222	1.0861	4.28478	-3.79808	-1.06592	-2.08971	-3.68207	-0.747971	-2.46292	-0.74878	-1.82205	-1.91098
																										Epichloe brachyelytri	symbiont	monomertroph	monomertroph - symbiont	-28.6839	-9.25631	-12.309	1.69763	1.53705	2.13226	5.42986	-4.56664	-0.871578	0.616102	-4.14948	-1.28593	2.0515	-0.796626	-3.35965	0.346656
																										Epichloe elymi	symbiont	monomertroph	monomertroph - symbiont	-33.401	-8.91691	-10.1617	0.376938	0.807393	-0.365121	4.38712	-5.58871	-0.947171	-1.78856	-4.72166	-1.22187	-2.5242	-3.01879	-1.83232	-2.35901
																										Epichloe festucae E894	symbiont	monomertroph	monomertroph - symbiont	-29.7578	-9.44354	-12.265	1.45901	2.21984	3.6867	8.76338	-6.68339	-2.21474	3.47185	-3.99799	-3.08614	3.79426	1.53101	-3.7696	1.49212
																										Epichloe festucae E2368	symbiont	monomertroph	monomertroph - symbiont	-28.9104	-9.65479	-12.0102	0.270077	1.45355	2.69548	9.72709	-7.2851	-0.794873	1.43231	-3.37945	-2.73693	2.32453	-1.52916	-2.92056	-0.818134
																										Epichloe glyceriae	symbiont	monomertroph	monomertroph - symbiont	-9.30503	-2.75424	-17.6782	6.0188	5.61118	11.2745	37.4049	29.3562	20.1526	15.3257	1.06552	19.1521	-15.6467	-0.743082	4.61309	2.3688
																										Epichloe typhina	symbiont	monomertroph	monomertroph - symbiont	-31.8858	-8.58516	-11.6882	-0.359363	2.43188	2.7715	6.45509	-4.17929	-0.0813747	0.144695	-3.58988	-1.24185	0.806125	1.46619	-2.55584	0.183412
																										Epichloe typhina subsp. Poae	symbiont	monomertroph	monomertroph - symbiont	-27.8886	-9.00742	-12.0002	-0.923234	1.013	1.19197	4.93829	-5.33417	-0.441966	-0.350569	-3.71033	-0.35878	0.170256	-1.21574	-2.21705	-0.16649
																										Rhizophagus irregularis (syn. Glomus intraradices)	symbiont	monomertroph	monomertroph - symbiont	-33.0603	-9.7354	-4.63818	-8.31304	0.679845	-5.02178	-6.08325	3.70543	-6.48715	-6.33694	2.18427	26.2236	1.85003	-10.4777	-7.01168	13.0294
																										Laccaria bicolor	symbiont	monomertroph	monomertroph - symbiont	-19.3165	-12.632	2.18399	-22.0963	-3.51844	-4.71693	12.7891	1.27288	-0.489311	-11.7969	-1.93563	-7.07535	7.03803	1.08677	-0.460602	1.35517
																										Oidiodendron maius	symbiont	monomertroph	monomertroph - symbiont	91.1961	12.3773	-15.8357	-23.0946	19.9341	13.885	-21.0728	-1.07857	26.2633	10.7437	4.41054	7.80894	14.4435	-1.07289	8.17589	-11.6478
																										Piloderma croceum	symbiont	monomertroph	monomertroph - symbiont	-1.77957	-11.4268	-2.25007	-18.7328	-12.7416	-3.65389	1.38877	7.02162	1.22277	-1.67089	-5.90034	0.59493	3.09359	-6.71114	-5.71117	4.07518
																										Piriformospora indica	symbiont	monomertroph	monomertroph - symbiont	-7.68717	-11.7243	48.4264	6.75688	40.6507	14.9126	-3.43579	14.0928	2.59723	-4.05605	4.72654	-14.1465	-3.85454	-1.63343	-4.48445	2.32125
																										Pisolithus microcarpus	symbiont	monomertroph	monomertroph - symbiont	-38.2741	-11.3962	-3.27066	-10.7254	0.376472	-2.46905	1.48708	6.31118	-3.80372	-2.28596	-1.44129	0.897606	4.06275	0.76039	-0.719147	0.492911
																										Pisolithus tinctorius	symbiont	monomertroph	monomertroph - symbiont	-29.8941	-11.9576	-6.78033	-12.3528	-1.1508	-1.05865	-1.7014	6.94241	-3.04333	-5.60056	0.0209936	-2.39177	2.50332	2.27373	0.791111	2.07057
																										Sebacina vermifera	symbiont	monomertroph	monomertroph - symbiont	-4.88243	-14.8759	50.5927	5.92732	28.1675	9.31286	1.27676	11.6366	1.90393	-8.59911	7.14906	-11.619	-6.37971	-2.15395	0.188259	0.930564
																										Tuber melanosporum	symbiont	monomertroph	monomertroph - symbiont	-41.6515	-10.8131	-5.83103	4.41327	1.4912	-3.29505	-4.22547	2.90046	-1.99373	2.31507	-3.43081	-1.11117	-3.14312	-2.17247	-2.38834	-0.40152
																										Aciculosporium take	symbiont	monomertroph	monomertroph - symbiont	-37.0773	-9.13777	-9.01466	0.879038	2.37257	0.454312	1.2846	-5.83248	2.67646	-2.1902	-2.96741	-1.47402	-3.49516	-1.03829	-1.03287	-3.91111
																										Dothistroma septosporum	hemibiotroph	mesotroph	mesotroph - external	-8.82268	-4.76863	-12.9919	-3.71166	-5.2624	5.6608	-1.43098	0.672553	13.6631	-6.46566	2.4969	1.82433	-2.13565	5.22161	-5.07936	0.557589
																										Fusarium graminearum	hemibiotroph	mesotroph	mesotroph - external	28.8181	1.48465	-8.90788	3.2491	5.01045	-3.67434	3.48078	0.421794	-7.72673	0.469692	0.0121423	-0.180355	-1.44933	-1.95164	-2.93619	-1.94074
																										Mycosphaerella fijiensis	hemibiotroph	mesotroph	mesotroph - external	5.6265	-1.94704	-18.3656	-1.47929	-2.90927	3.72969	-2.48848	1.01398	11.5578	-9.38227	0.328273	3.52325	-3.28551	4.61135	-1.58296	0.000606179
																										Zymoseptoria tritici	hemibiotroph	mesotroph	mesotroph - external	-5.72064	-3.75983	-17.878	-1.21434	-3.15184	4.09923	-3.60498	1.43648	5.40018	-4.96259	0.292487	3.97737	-1.0039	4.95807	-3.99635	-3.58325
																										Moniliophthora perniciosa	hemibiotroph	mesotroph	mesotroph - external	-25.533	-17.4967	14.1602	-4.86297	-13.2057	-4.59346	1.58858	7.92591	-1.58635	8.21226	-2.85826	-8.10898	-1.85435	2.95921	1.90043	-3.47374
																										Leptosphaeria maculans	hemibiotroph	mesotroph	mesotroph - external	-9.72174	-5.98438	38.9033	-2.78326	9.01555	-21.5304	3.51989	-0.0542226	0.278216	-5.35515	-2.89525	12.4017	6.54788	-0.00382233	1.19322	-2.80518
																										Magnaporthe oryzae	hemibiotroph	mesotroph	mesotroph - internal	18.189	-6.33384	1.81922	21.3018	3.70351	7.32509	-3.56177	-2.14479	-1.49359	-1.06552	5.84369	-0.505987	2.79902	3.6562	-4.63257	3.88346
																										Armillaria mellea	necrotroph	polymertroph	polymertroph - broad host range	18.9302	-12.1751	22.0597	-20.3739	-17.1611	-3.09761	6.13199	4.26226	6.39451	1.80714	-7.29999	-5.09526	1.58527	5.67572	3.05013	1.98631
																										Botrytis cinerea B05	necrotroph	polymertroph	polymertroph - broad host range	13.0382	0.110221	1.77847	-6.59541	5.33424	-4.76057	-7.95908	-12.5598	8.60361	0.618659	-4.00971	-0.445936	-6.72922	-1.69883	1.69923	7.42583
																										Botrytis cinerea BcDW1	necrotroph	polymertroph	polymertroph - broad host range	27.5687	1.69169	0.876672	-12.0573	4.88622	-3.99727	-12.7201	-11.156	8.84789	-1.02902	-2.85084	-0.979473	-7.24715	-3.49125	1.57522	8.13403
																										Botrytis cinerea T4	necrotroph	polymertroph	polymertroph - broad host range	19.632	-0.994346	0.812018	-8.3711	3.19857	-3.51906	-10.9527	-10.8923	9.2874	1.08812	-2.82358	-3.18486	-5.75572	-4.56133	0.368562	7.292
																										Colletotrichum gloeosporioides	hemibiotroph	mesotroph	polymertroph - broad host range	96.2463	4.39241	1.75753	7.11613	-8.30631	-11.3856	-5.62748	3.80957	-1.96338	18.0467	-5.29605	1.33202	-4.36617	0.021724	0.195903	7.20961
																										Colletotrichum graminicola	hemibiotroph	mesotroph	polymertroph - broad host range	28.9587	-6.78191	10.0864	11.64	0.289599	2.66823	1.98424	-1.92559	-1.04124	2.83908	3.11806	-4.21516	-0.613035	4.84026	3.25686	5.96541
																										Colletotrichum higginsianum	hemibiotroph	mesotroph	polymertroph - broad host range	36.3207	-0.568172	7.60891	7.90294	-0.154902	-3.93397	4.31022	-7.06599	0.170161	6.25851	2.55902	-3.74437	2.10996	13.3338	-0.7266	10.0981
																										Colletotrichum orbiculare	hemibiotroph	mesotroph	polymertroph - broad host range	51.1324	1.12302	12.9006	13.6561	0.0629871	-9.71603	1.53516	-4.11247	-1.80072	10.0028	-0.426734	0.216314	-4.54514	4.5885	-0.258176	3.77391
																										Eutypa lata	necrotroph	polymertroph	polymertroph - broad host range	41.5295	-12.4223	3.00689	28.4911	-20.8463	-6.98338	6.68792	1.68176	2.12919	5.48272	-13.3875	-3.60274	6.06785	-9.57923	6.3745	-3.59081
																										Gaeumannomyces graminis	necrotroph	polymertroph	polymertroph - broad host range	14.8932	-9.97443	3.59812	22.6792	4.39167	7.32431	2.33515	-3.53088	-2.70309	3.96631	1.01705	-2.53739	7.01849	3.77832	1.43559	5.81334
																										Heterobasidion annosum	necrotroph	polymertroph	polymertroph - broad host range	-1.20535	-11.8873	14.6918	-18.7347	-7.95655	7.47206	-3.12665	5.41991	1.24365	0.934819	-4.78832	-4.27136	-2.16249	4.15228	1.432	-0.183994
																										Macrophomina phaseolina	necrotroph	polymertroph	polymertroph - broad host range	36.6863	-0.646566	-8.14136	-4.89288	-10.8919	-3.11575	-10.3826	-4.39341	5.23652	-5.47598	2.39348	0.867126	-6.5369	6.08174	-0.329471	7.00149
																										Rhizoctonia solani AG8	necrotroph	polymertroph	polymertroph - broad host range	-9.72174	-5.98438	38.9033	-2.78326	9.01555	-21.5304	3.51989	-0.0542226	0.278216	-5.35515	-2.89525	12.4017	6.54788	-0.00382233	1.19322	-2.80518
																										Rhizoctonia solani AG1-IA	necrotroph	polymertroph	polymertroph - broad host range	21.2671	-2.72013	57.5083	-6.66999	13.1751	-27.4039	12.3149	-3.26238	4.71432	-4.29213	-5.46246	10.0354	8.05738	1.33845	1.99871	-1.27532
																										Sclerotinia sclerotiorum	necrotroph	polymertroph	polymertroph - broad host range	1.55569	-4.23181	3.08965	-1.75928	9.31067	-1.64604	-4.32534	-11.4964	9.05658	2.17217	-3.88133	-2.21292	-2.31418	-3.4984	0.976637	6.03367
																										Setosphaeria turcica	hemibiotroph	mesotroph	polymertroph - broad host range	21.6971	-7.96573	2.02888	14.7945	-7.77259	-2.29456	-4.67602	4.02565	0.807162	-6.39322	0.414775	1.44446	-0.79525	-0.38528	2.49602	-4.09907
																										Zymoseptoria brevis	necrotroph	polymertroph	polymertroph - broad host range	-4.83515	-3.35605	-18.2617	-3.26415	-2.45398	4.26812	-1.8641	1.04696	5.54137	-4.50126	0.62731	3.3088	-1.52789	6.22032	-5.34745	-1.79549
																										Zymoseptoria pseudotritici	necrotroph	polymertroph	polymertroph - broad host range	0.888761	-3.27632	-19.3197	-4.23509	-3.79464	5.32423	-2.68096	2.92035	6.14251	-4.4809	1.42552	2.77303	0.085159	6.26409	-5.04233	-2.88976
																										Sclerotinia borealis	necrotroph	polymertroph	polymertroph - broad host range	8.6158	-2.14937	1.20761	-3.78517	3.70667	-3.59269	-8.4522	-10.581	7.26577	2.50862	-6.01843	-2.72052	-3.50603	-7.09071	-0.221728	5.36145
																										Alternaria brassicicola	necrotroph	polymertroph	polymertroph - narrow host range	8.07413	-6.02017	3.02599	15.9347	-4.32524	-4.6482	-1.90042	2.37929	1.07794	-5.4756	-2.65616	0.031042	1.07542	2.7362	-1.11661	-3.42524
																										Cochliobolus carbonum	necrotroph	polymertroph	polymertroph - narrow host range	24.8425	-7.95831	2.19116	19.8353	-8.59222	2.38752	-3.3643	2.0139	1.54252	-5.78136	2.50206	-0.0692745	1.35248	0.424969	0.592366	-0.0669608
																										Cochliobolus heterostrophus C4	necrotroph	polymertroph	polymertroph - narrow host range	26.4784	-8.7431	0.56233	22.0496	-10.8751	2.81007	-2.4747	2.66313	1.45863	-6.44339	1.42714	-0.20954	2.04923	1.08713	-1.16928	1.93642
																										Cochliobolus heterstrophus C5	necrotroph	polymertroph	polymertroph - narrow host range	31.2946	-8.6195	0.882288	23.8477	-11.6321	2.51888	-3.52573	1.90551	3.02447	-7.23127	1.76869	1.1343	2.86125	0.147928	-1.40333	0.380964
																										Cochliobolus miyabeanus	necrotroph	polymertroph	polymertroph - narrow host range	23.1954	-7.57563	2.163	19.0959	-7.94631	1.27802	-3.77788	2.01163	1.10645	-7.40693	2.69649	1.88748	1.44264	0.720436	2.01234	-1.7563
																										Cochliobolus sativus	necrotroph	polymertroph	polymertroph - narrow host range	22.6286	-8.08286	0.583671	21.8184	-6.88817	2.2546	-1.56202	2.45161	0.684962	-4.24363	2.84101	0.874069	1.93626	2.28669	0.0374897	0.786558
																										Cochliobolus victoriae	necrotroph	polymertroph	polymertroph - narrow host range	27.2568	-7.89542	1.01752	20.3614	-9.13804	2.56187	-3.727	3.42046	0.897508	-5.28096	2.17119	0.401241	3.06174	1.01277	-0.104797	1.49354
																										Pyrenophora teres teres	necrotroph	polymertroph	polymertroph - narrow host range	15.7888	-8.65049	1.0767	17.6548	-6.79423	-1.16463	-6.50493	2.70555	2.44284	-9.48987	1.22751	0.972569	0.798393	-1.48916	3.96905	-3.98796
																										Parastagonospora nodorum	necrotroph	polymertroph	polymertroph - narrow host range	23.5649	-8.73601	0.734638	18.5125	-8.49161	0.363402	-7.53263	6.07557	0.7794	-5.62734	1.97296	1.89319	-0.503456	-2.00329	3.53691	-4.31379
																										Moniliophthora roreri	hemibiotroph	mesotroph	polymertroph - narrow host range	68.3448	-18.9164	23.8131	-26.8397	-29.2099	-0.0859606	6.76084	7.00682	8.05109	3.64463	-0.952173	-18.2769	-0.175656	-9.86348	7.37391	-2.3455
																										Pyrenophora tritici-repentis	necrotroph	polymertroph	polymertroph - narrow host range	13.616	-9.65963	2.65863	16.347	-8.27802	-2.77699	-5.75212	2.15146	2.70793	-6.23361	0.16184	0.548279	-3.09919	-3.01395	5.37061	-4.65837
																										Agaricus bisporus	saprotroph	saprotroph	saprotroph	-6.4572	-14.7675	19.0057	-19.4808	-4.99258	2.74906	1.93101	5.2911	1.12491	-2.74445	0.403686	-2.02026	2.02558	-0.530889	-4.45033	0.662686
																										Aspergillus fumigatus	saprotroph	saprotroph	saprotroph	4.14571	0.383162	-2.37659	2.31541	8.62314	1.20435	-2.87007	-1.80034	9.45178	7.1786	-2.2576	-2.36389	1.53173	-2.36548	-0.794065	-1.49928
																										Aspergillus nidulans	saprotroph	saprotroph	saprotroph	19.5932	-2.08754	-9.96227	7.31412	-3.37828	-3.45427	-4.44413	3.87424	2.77428	10.563	-4.75758	-1.43784	3.59983	-1.0415	-3.16288	3.9119
																										Debaryomyces hansenii	saprotroph	saprotroph	saprotroph	-55.2608	-5.92031	-6.09601	3.07653	0.979619	1.511	-3.02949	1.80489	-2.77066	3.00435	-5.38867	-2.8922	-2.81104	-1.10464	-1.84202	-4.27013
																										Gloeophyllum trabeum	saprotroph	saprotroph	saprotroph	-7.02442	-8.24679	-1.79887	-21.1017	-6.45086	-2.5023	3.70179	7.11249	4.69118	-3.20338	-4.75723	-5.29347	2.11432	2.48542	0.828242	2.56307
																										Komagataella pastoris	saprotroph	saprotroph	saprotroph	-59.871	-9.70942	-3.8167	2.18393	2.32455	-1.00531	-7.72475	1.13289	-4.0619	2.97831	-5.1547	-1.03522	-4.01458	-1.50325	-0.544846	-3.97058
																										Neurospora crassa	saprotroph	saprotroph	saprotroph	-13.2027	-9.04097	3.11527	10.6598	12.0455	5.51366	-2.43884	-4.09196	1.51201	-0.0498479	-1.37727	-3.39158	1.17176	-1.92448	3.79613	1.50726
																										Saccharomyces cerevisiae	saprotroph	saprotroph	saprotroph	-60.3831	-8.39732	-4.7547	2.68283	1.07204	-1.3183	-5.68527	0.773842	-4.02104	2.41851	-4.78487	-1.74748	-4.32677	-2.58653	-1.66486	-5.5764
																										Schizosaccharomyces pombe	saprotroph	saprotroph	saprotroph	-56.3489	-11.3485	-7.01432	-0.42755	3.16518	-2.16268	-8.53381	1.97858	-2.64711	2.63461	-4.77357	-0.366601	-4.00419	-0.829115	-0.472762	-5.51486
																										Serpula lacrymans	saprotroph	saprotroph	saprotroph	-10.2769	-7.67796	-3.51776	-19.6758	5.61094	-0.325779	-1.94588	7.60831	1.72259	-1.8006	-0.760785	-0.291167	6.34421	5.20395	1.61838	1.94547
																										Sphaerobolus stellatus	saprotroph	saprotroph	saprotroph	84.9506	-19.9273	77.9089	-19.3588	-21.9452	35.1538	-3.10606	-15.3269	-15.0781	4.7075	1.21524	16.0653	-9.65977	-3.08083	-10.6961	-5.63381
																										Trametes versicolor	saprotroph	saprotroph	saprotroph	14.149	-9.38238	14.1968	-25.4407	3.32597	13.2445	4.44518	-3.03782	-8.60248	0.931655	2.5249	1.9218	6.90888	14.7091	9.89605	0.453261
																										Trichoderma virens	saprotroph	saprotroph	saprotroph	28.9763	-7.96791	-8.37486	2.64406	8.72631	14.3462	-0.175817	0.120003	4.69859	15.2256	-3.38317	-2.19992	16.9584	-10.3356	-10.5946	-1.24032
																										Uncinocarpus reesii	saprotroph	saprotroph	saprotroph	-40.2126	-9.4624	-11.0866	1.28125	1.75351	1.18259	0.209205	-1.32307	-4.71668	4.76523	-2.99986	-2.05881	2.5185	0.710174	-3.06371	1.76806
																										Fusarium avenaceae	necrotroph	vasculartroph	vasculartroph	59.1925	4.28228	-13.2249	3.02753	5.36165	-4.27476	4.11479	4.85007	-11.7479	5.59721	-1.16543	-2.7038	3.99906	-2.12192	-6.74416	-1.5486
																										Fusarium fujikuroi	necrotroph	vasculartroph	vasculartroph	59.853	6.73239	-18.1522	-11.4647	3.91861	-1.963	-6.46013	7.64759	-6.79791	-4.64099	5.30024	0.643351	-0.801733	1.37044	-2.37696	-3.95214
																										Fusarium oxysporum fsp lycopersici	necrotroph	vasculartroph	vasculartroph	73.1448	7.0829	-16.6856	-4.13009	3.30704	-6.12827	1.1617	-1.76941	-11.9722	3.16756	-3.5555	0.407413	-1.99514	-2.44972	2.15081	-2.49767
																										Fusarium verticilliodes	necrotroph	vasculartroph	vasculartroph	45.865	3.51958	-13.296	-1.45203	6.20888	-1.78435	3.03594	3.8619	-7.22258	-0.389515	1.58839	-1.49745	-1.80543	2.31151	-3.72573	-0.313447
																										Fusarium solani	necrotroph	vasculartroph	vasculartroph	88.2743	13.3245	-26.1385	-12.8893	5.56232	-3.99045	-5.36872	12.8355	-6.92433	10.0271	-0.800885	2.12587	4.9225	3.26126	-6.16716	-0.28361
																										Verticillium albo-atrum	necrotroph	vasculartroph	vasculartroph	5.3194	0.094487	10.6447	15.3787	10.0055	-4.87892	0.0152688	-3.83398	0.329187	8.01751	-5.20614	5.23443	-8.6814	4.50967	2.70738	-5.77715
																										Verticillium dahliae	hemibiotroph	vasculartroph	vasculartroph	14.3783	-2.99669	14.2045	16.5649	13.7181	-3.21358	-1.965	-2.8747	-1.36944	6.34337	-2.35758	3.82545	-5.06559	2.01284	5.0134	-6.97763
																										Fusarium oxysporum fsp cubense race 1	necrotroph	vasculartroph	vasculartroph	67.3531	8.39218	-17.7256	-12.3992	8.25977	-7.12505	0.328964	0.536818	-11.6137	1.23631	0.858619	-1.26117	-3.56926	0.20833	1.52255	-2.87463
																										Fusarium oxysporum fsp cubense race 4	necrotroph	vasculartroph	vasculartroph	58.2354	5.86848	-13.0042	-6.24548	7.41607	-5.83669	-3.62021	1.43799	-11.5624	-1.8382	1.12678	0.0663691	-3.47577	1.49545	3.16488	-3.75071
																										Fusarium oxysporum fsp cubense tropical race 4	necrotroph	vasculartroph	vasculartroph	90.8808	13.6983	-20.0782	-14.0909	10.3759	-2.23183	1.33153	-0.273952	-8.0062	-11.4695	0.569862	-1.17116	-8.38611	-3.45719	6.79729	-0.650085
																										Fusarium oxysporum fsp melonis	necrotroph	vasculartroph	vasculartroph	111.829	18.2225	-29.0488	-12.8605	8.96812	0.26037	8.31121	-3.04074	-11.028	-8.87101	-1.59192	-0.575937	-3.62551	-2.25391	6.22989	2.39333
																										Fusarium psuedograminearum	necrotroph	vasculartroph	vasculartroph	115.2	14.2558	-11.1791	14.2856	5.88071	3.76381	18.9099	0.876845	-5.78938	-8.74038	4.43955	-5.08472	1.93956	-6.06441	-7.79648	-0.0270483

## Sheet: Post-prediction
																										Species	Primary CATAStrophy prediction	pc01	pc02	pc03	pc04	pc05	pc06	pc07	pc08	pc09	pc10	pc11	pc12	pc13	pc14	pc15	pc16
																										Piloderma croceum	Me	-1.77957	-11.4268	-2.25007	-18.7328	-12.7416	-3.65389	1.38877	7.02162	1.22277	-1.67089	-5.90034	0.59493	3.09359	-6.71114	-5.71117	4.07518
																										Dothistroma septosporum	Me	-8.82268	-4.76863	-12.9919	-3.71166	-5.2624	5.6608	-1.43098	0.672553	13.6631	-6.46566	2.4969	1.82433	-2.13565	5.22161	-5.07936	0.557589
																										Mycosphaerella fijiensis	Me	5.6265	-1.94704	-18.3656	-1.47929	-2.90927	3.72969	-2.48848	1.01398	11.5578	-9.38227	0.328273	3.52325	-3.28551	4.61135	-1.58296	0.000606179
																										Zymoseptoria tritici	Me	-5.72064	-3.75983	-17.878	-1.21434	-3.15184	4.09923	-3.60498	1.43648	5.40018	-4.96259	0.292487	3.97737	-1.0039	4.95807	-3.99635	-3.58325
																										Passalora fulva	Me	9.76516	1.87927	-14.9763	-2.40985	-6.14889	0.346442	-3.09122	-2.27621	13.8415	-4.44854	-1.25488	6.68742	-2.97141	6.62558	-3.66737	-1.20869
																										Colletotrichum higginsianum	Me	36.3207	-0.568172	7.60891	7.90294	-0.154902	-3.93397	4.31022	-7.06599	0.170161	6.25851	2.55902	-3.74437	2.10996	13.3338	-0.7266	10.0981
																										Colletotrichum orbiculare	Me	51.1324	1.12302	12.9006	13.6561	0.0629871	-9.71603	1.53516	-4.11247	-1.80072	10.0028	-0.426734	0.216314	-4.54514	4.5885	-0.258176	3.77391
																										Zymoseptoria brevis	Me	-4.83515	-3.35605	-18.2617	-3.26415	-2.45398	4.26812	-1.8641	1.04696	5.54137	-4.50126	0.62731	3.3088	-1.52789	6.22032	-5.34745	-1.79549
																										Zymoseptoria pseudotritici	Me	0.888761	-3.27632	-19.3197	-4.23509	-3.79464	5.32423	-2.68096	2.92035	6.14251	-4.4809	1.42552	2.77303	0.085159	6.26409	-5.04233	-2.88976
																										Moniliophthora roreri	Me	68.3448	-18.9164	23.8131	-26.8397	-29.2099	-0.0859606	6.76084	7.00682	8.05109	3.64463	-0.952173	-18.2769	-0.175656	-9.86348	7.37391	-2.3455
																										Aspergillus fumigatus	Me	4.14571	0.383162	-2.37659	2.31541	8.62314	1.20435	-2.87007	-1.80034	9.45178	7.1786	-2.2576	-2.36389	1.53173	-2.36548	-0.794065	-1.49928
																										Gloeophyllum trabeum	Me	-7.02442	-8.24679	-1.79887	-21.1017	-6.45086	-2.5023	3.70179	7.11249	4.69118	-3.20338	-4.75723	-5.29347	2.11432	2.48542	0.828242	2.56307
																										Sphaerobolus stellatus	Me	84.9506	-19.9273	77.9089	-19.3588	-21.9452	35.1538	-3.10606	-15.3269	-15.0781	4.7075	1.21524	16.0653	-9.65977	-3.08083	-10.6961	-5.63381
																										Colletotrichum graminicola	Me/P	28.9587	-6.78191	10.0864	11.64	0.289599	2.66823	1.98424	-1.92559	-1.04124	2.83908	3.11806	-4.21516	-0.613035	4.84026	3.25686	5.96541
																										Macrophomina phaseolina	Me/P	36.6863	-0.646566	-8.14136	-4.89288	-10.8919	-3.11575	-10.3826	-4.39341	5.23652	-5.47598	2.39348	0.867126	-6.5369	6.08174	-0.329471	7.00149
																										Albugo laibachii	Mo	-47.308	3.20685	-2.50999	0.337058	-6.67816	16.2774	1.51623	-7.39603	-15.9875	12.0898	0.396512	6.15905	3.62902	6.2486	12.0326	1.8996
																										Blumeria graminis fsp tritici	Mo	-48.5896	-11.5881	-8.26199	-1.76676	3.20766	-1.78836	-1.32561	-2.50493	-4.01484	0.607747	-0.84788	-1.44445	-1.10884	0.284851	0.840936	-1.74948
																										Erysiphe necator	Mo	-46.6963	-11.51	-8.67161	-1.20457	2.37261	-0.912222	-2.6351	-3.26616	-3.43647	-0.45854	-1.31343	-1.20815	-1.62013	0.083834	0.244608	-1.6794
																										Hyaloperonospora arabidopsidis	Mo	-50.3488	12.5448	0.0641427	1.15727	-4.47501	-1.24448	-4.72635	3.20996	-7.61859	4.1096	-0.722791	-0.701665	-0.900617	-1.70042	1.17846	0.34626
																										Melampsora laricis-populina	Mo	-18.8962	-11.1807	-1.97392	-6.91277	-6.06479	-13.2992	-0.121987	-4.534	1.539	4.99868	28.6635	-2.42609	-1.36025	0.166815	-1.53708	-0.758371
																										Phytophthora capsici	Mo	-27.0328	59.202	10.9668	-0.785767	-2.22685	-3.12041	-0.412314	-1.80337	1.0055	3.25344	0.212422	-2.54564	-1.29393	4.83732	-2.1618	-4.20392
																										Phytophthora sojae	Mo	-13.5928	75.7981	17.1584	2.79515	-5.2012	-6.15793	0.722126	-7.00717	5.44369	-1.33617	1.73902	-1.88637	0.247689	1.72711	-5.8535	-4.21395
																										Phytophthora kernoviae	Mo	-41.0483	29.6032	4.15357	1.67684	-1.09707	-1.26171	-3.42	3.96769	-0.606613	4.47356	-3.97243	-1.41442	-4.49177	0.733648	1.99021	-1.40441
																										Phytophthora lateralis	Mo	-45.664	37.475	8.52294	0.57216	-2.66269	-0.259988	-4.25256	1.6743	-0.100352	5.17851	-2.22896	-1.44262	-2.62521	-2.33673	-3.19136	-1.46892
																										Phytophthora parasitica	Mo	-18.3566	74.2321	10.0088	0.0785165	-7.0548	6.68318	7.857	-0.561828	5.56267	-4.13306	3.56608	-2.71245	-0.616848	-6.32169	1.85536	4.54213
																										Puccinia graminis	Mo	-17.2586	-11.671	-5.71084	-5.73876	-5.72806	-9.43549	1.19072	-5.25419	1.64499	7.45012	29.7864	-0.0587027	1.12585	-7.16533	1.20198	-1.27296
																										Puccinia triticina	Mo	-42.1415	-13.814	-2.22073	-3.37808	-2.19851	-8.69728	4.35689	-4.47698	-1.28958	10.0423	18.0526	-2.18312	0.504756	-2.46806	0.215686	-2.00583
																										Puccinia striformis	Mo	-40.0131	-13.2639	0.264975	-0.157489	-4.78354	-8.83366	5.12028	-4.79113	1.02362	5.81352	21.1733	-2.47466	-2.58779	-2.03746	-0.325657	-1.41486
																										Pythium arrhenomanes	Mo	-37.6283	22.4677	-3.01962	-1.7688	-4.00302	10.2828	-4.63034	3.27147	-6.01537	-4.79911	5.35747	6.79438	5.08048	-2.79602	7.48429	1.90067
																										Pythium irregulare	Mo	-42.2294	20.1587	-0.945222	2.1357	-1.16892	7.70135	-5.22091	6.21923	-4.14901	-3.77595	2.54756	2.78404	4.50356	-3.1222	7.59636	3.08997
																										Pythium iwayamai	Mo	-45.8769	17.3453	2.66513	-0.352647	3.00815	9.46209	-3.72009	4.86743	-5.28076	-1.20057	-0.342089	3.2752	3.52874	-8.70907	4.71889	3.21797
																										Pythium vexans	Mo	-40.2386	28.4078	0.973671	-0.989688	-0.578724	4.50478	-1.86942	5.59963	-3.30136	-2.47581	-1.96091	-0.390238	0.763549	-5.03525	2.94751	4.06539
																										Sporisorium reilianum	Mo	-33.4778	-8.80285	-6.95547	-9.274	-1.30843	-1.12653	-0.947204	5.27676	-2.03311	-3.09772	0.887694	-2.90418	-3.91143	2.74205	-1.67717	-0.0905045
																										Tremella mesenterica	Mo	-49.0606	-11.3117	-3.03946	-4.09718	1.18532	-3.70688	-0.552267	2.80352	-2.6489	-0.126008	-0.41315	6.18396	2.23042	-1.30697	-6.61741	0.542412
																										Blumeria graminis f. sp. hordei	Mo	-48.5783	-11.5161	-8.43502	-1.7229	3.14504	-1.03027	-0.672613	-3.06931	-3.1448	0.264193	-0.813038	-1.30725	-1.13326	0.523371	1.83052	-1.87056
																										Albugo candida	Mo	-55.2165	8.31405	-2.1452	2.38675	-0.937964	2.28758	-3.34268	-1.76574	-4.40714	3.02183	-0.574113	3.95551	-1.83187	-1.82685	10.3396	3.46398
																										Phytophthora ramorum	Mo	-23.3637	62.5022	13.5393	0.448615	-5.22594	0.535692	1.01393	0.467228	1.64421	0.0945938	0.276738	-2.88723	2.2094	1.83715	-3.53871	-1.65366
																										Pythium ultimum	Mo	-40.5183	30.4299	2.12203	0.633944	-2.12304	6.11673	-1.16757	8.04311	-3.26313	-4.81727	2.27245	-0.124543	4.40065	-2.9201	4.94	3.87201
																										Magnaporthe poae	Mo	-11.1718	-10.8391	2.00856	19.2419	5.8518	2.73753	2.0165	-3.4316	-2.19904	5.21817	-0.0856737	-2.41654	7.55982	8.26743	1.3569	6.46775
																										Taphrina deformans	Mo	-46.0294	-10.6375	-7.40143	-4.68542	2.16094	-3.98476	-7.9344	1.08437	-4.96412	0.572739	-3.60608	-1.4728	-1.548	1.55053	-0.995713	-2.55464
																										Ustilaginoidea virens	Mo	-9.82704	-4.19024	-15.5707	-0.00692105	3.90803	8.05881	19.6593	-22.9329	4.84361	-6.96506	-1.79281	0.437704	1.23485	-2.3767	2.95655	-3.43874
																										Ustilago maydis	Mo	-9.82704	-4.19024	-15.5707	-0.00692105	3.90803	8.05881	19.6593	-22.9329	4.84361	-6.96506	-1.79281	0.437704	1.23485	-2.3767	2.95655	-3.43874
																										Ustilago hordei	Mo	-37.1956	-9.3139	-7.06237	-7.57027	-0.281819	-1.18121	-1.97831	3.70554	-3.35408	-2.66545	-0.258525	-2.0266	-2.75425	2.64975	-1.29985	0.513908
																										Epichloe amarillans	Mo	-29.8557	-8.37812	-11.1005	-2.89109	1.08222	1.0861	4.28478	-3.79808	-1.06592	-2.08971	-3.68207	-0.747971	-2.46292	-0.74878	-1.82205	-1.91098
																										Epichloe brachyelytri	Mo	-28.6839	-9.25631	-12.309	1.69763	1.53705	2.13226	5.42986	-4.56664	-0.871578	0.616102	-4.14948	-1.28593	2.0515	-0.796626	-3.35965	0.346656
																										Epichloe elymi	Mo	-33.401	-8.91691	-10.1617	0.376938	0.807393	-0.365121	4.38712	-5.58871	-0.947171	-1.78856	-4.72166	-1.22187	-2.5242	-3.01879	-1.83232	-2.35901
																										Epichloe festucae E894	Mo	-29.7578	-9.44354	-12.265	1.45901	2.21984	3.6867	8.76338	-6.68339	-2.21474	3.47185	-3.99799	-3.08614	3.79426	1.53101	-3.7696	1.49212
																										Epichloe festucae E2368	Mo	-28.9104	-9.65479	-12.0102	0.270077	1.45355	2.69548	9.72709	-7.2851	-0.794873	1.43231	-3.37945	-2.73693	2.32453	-1.52916	-2.92056	-0.818134
																										Epichloe glyceriae	Mo	-9.30503	-2.75424	-17.6782	6.0188	5.61118	11.2745	37.4049	29.3562	20.1526	15.3257	1.06552	19.1521	-15.6467	-0.743082	4.61309	2.3688
																										Epichloe typhina	Mo	-31.8858	-8.58516	-11.6882	-0.359363	2.43188	2.7715	6.45509	-4.17929	-0.0813747	0.144695	-3.58988	-1.24185	0.806125	1.46619	-2.55584	0.183412
																										Epichloe typhina subsp. Poae	Mo	-27.8886	-9.00742	-12.0002	-0.923234	1.013	1.19197	4.93829	-5.33417	-0.441966	-0.350569	-3.71033	-0.35878	0.170256	-1.21574	-2.21705	-0.16649
																										Rhizophagus irregularis (syn. Glomus intraradices)	Mo	-33.0603	-9.7354	-4.63818	-8.31304	0.679845	-5.02178	-6.08325	3.70543	-6.48715	-6.33694	2.18427	26.2236	1.85003	-10.4777	-7.01168	13.0294
																										Laccaria bicolor	Mo	-19.3165	-12.632	2.18399	-22.0963	-3.51844	-4.71693	12.7891	1.27288	-0.489311	-11.7969	-1.93563	-7.07535	7.03803	1.08677	-0.460602	1.35517
																										Pisolithus microcarpus	Mo	-38.2741	-11.3962	-3.27066	-10.7254	0.376472	-2.46905	1.48708	6.31118	-3.80372	-2.28596	-1.44129	0.897606	4.06275	0.76039	-0.719147	0.492911
																										Pisolithus tinctorius	Mo	-29.8941	-11.9576	-6.78033	-12.3528	-1.1508	-1.05865	-1.7014	6.94241	-3.04333	-5.60056	0.0209936	-2.39177	2.50332	2.27373	0.791111	2.07057
																										Tuber melanosporum	Mo	-41.6515	-10.8131	-5.83103	4.41327	1.4912	-3.29505	-4.22547	2.90046	-1.99373	2.31507	-3.43081	-1.11117	-3.14312	-2.17247	-2.38834	-0.40152
																										Aciculosporium take	Mo	-37.0773	-9.13777	-9.01466	0.879038	2.37257	0.454312	1.2846	-5.83248	2.67646	-2.1902	-2.96741	-1.47402	-3.49516	-1.03829	-1.03287	-3.91111
																										Debaryomyces hansenii	Mo	-55.2608	-5.92031	-6.09601	3.07653	0.979619	1.511	-3.02949	1.80489	-2.77066	3.00435	-5.38867	-2.8922	-2.81104	-1.10464	-1.84202	-4.27013
																										Komagataella pastoris	Mo	-59.871	-9.70942	-3.8167	2.18393	2.32455	-1.00531	-7.72475	1.13289	-4.0619	2.97831	-5.1547	-1.03522	-4.01458	-1.50325	-0.544846	-3.97058
																										Neurospora crassa	Mo	-13.2027	-9.04097	3.11527	10.6598	12.0455	5.51366	-2.43884	-4.09196	1.51201	-0.0498479	-1.37727	-3.39158	1.17176	-1.92448	3.79613	1.50726
																										Saccharomyces cerevisiae	Mo	-60.3831	-8.39732	-4.7547	2.68283	1.07204	-1.3183	-5.68527	0.773842	-4.02104	2.41851	-4.78487	-1.74748	-4.32677	-2.58653	-1.66486	-5.5764
																										Schizosaccharomyces pombe	Mo	-56.3489	-11.3485	-7.01432	-0.42755	3.16518	-2.16268	-8.53381	1.97858	-2.64711	2.63461	-4.77357	-0.366601	-4.00419	-0.829115	-0.472762	-5.51486
																										Uncinocarpus reesii	Mo	-40.2126	-9.4624	-11.0866	1.28125	1.75351	1.18259	0.209205	-1.32307	-4.71668	4.76523	-2.99986	-2.05881	2.5185	0.710174	-3.06371	1.76806
																										Fusarium graminearum	P	28.8181	1.48465	-8.90788	3.2491	5.01045	-3.67434	3.48078	0.421794	-7.72673	0.469692	0.0121423	-0.180355	-1.44933	-1.95164	-2.93619	-1.94074
																										Magnaporthe oryzae	P	18.189	-6.33384	1.81922	21.3018	3.70351	7.32509	-3.56177	-2.14479	-1.49359	-1.06552	5.84369	-0.505987	2.79902	3.6562	-4.63257	3.88346
																										Armillaria mellea	P	18.9302	-12.1751	22.0597	-20.3739	-17.1611	-3.09761	6.13199	4.26226	6.39451	1.80714	-7.29999	-5.09526	1.58527	5.67572	3.05013	1.98631
																										Botrytis cinerea B05	P	13.0382	0.110221	1.77847	-6.59541	5.33424	-4.76057	-7.95908	-12.5598	8.60361	0.618659	-4.00971	-0.445936	-6.72922	-1.69883	1.69923	7.42583
																										Botrytis cinerea BcDW1	P	27.5687	1.69169	0.876672	-12.0573	4.88622	-3.99727	-12.7201	-11.156	8.84789	-1.02902	-2.85084	-0.979473	-7.24715	-3.49125	1.57522	8.13403
																										Botrytis cinerea T4	P	19.632	-0.994346	0.812018	-8.3711	3.19857	-3.51906	-10.9527	-10.8923	9.2874	1.08812	-2.82358	-3.18486	-5.75572	-4.56133	0.368562	7.292
																										Eutypa lata	P	41.5295	-12.4223	3.00689	28.4911	-20.8463	-6.98338	6.68792	1.68176	2.12919	5.48272	-13.3875	-3.60274	6.06785	-9.57923	6.3745	-3.59081
																										Gaeumannomyces graminis	P	14.8932	-9.97443	3.59812	22.6792	4.39167	7.32431	2.33515	-3.53088	-2.70309	3.96631	1.01705	-2.53739	7.01849	3.77832	1.43559	5.81334
																										Rhizoctonia solani AG1-IA	P	21.2671	-2.72013	57.5083	-6.66999	13.1751	-27.4039	12.3149	-3.26238	4.71432	-4.29213	-5.46246	10.0354	8.05738	1.33845	1.99871	-1.27532
																										Sclerotinia sclerotiorum	P	1.55569	-4.23181	3.08965	-1.75928	9.31067	-1.64604	-4.32534	-11.4964	9.05658	2.17217	-3.88133	-2.21292	-2.31418	-3.4984	0.976637	6.03367
																										Setosphaeria turcica	P	21.6971	-7.96573	2.02888	14.7945	-7.77259	-2.29456	-4.67602	4.02565	0.807162	-6.39322	0.414775	1.44446	-0.79525	-0.38528	2.49602	-4.09907
																										Sclerotinia borealis	P	8.6158	-2.14937	1.20761	-3.78517	3.70667	-3.59269	-8.4522	-10.581	7.26577	2.50862	-6.01843	-2.72052	-3.50603	-7.09071	-0.221728	5.36145
																										Alternaria brassicicola	P	8.07413	-6.02017	3.02599	15.9347	-4.32524	-4.6482	-1.90042	2.37929	1.07794	-5.4756	-2.65616	0.031042	1.07542	2.7362	-1.11661	-3.42524
																										Cochliobolus carbonum	P	24.8425	-7.95831	2.19116	19.8353	-8.59222	2.38752	-3.3643	2.0139	1.54252	-5.78136	2.50206	-0.0692745	1.35248	0.424969	0.592366	-0.0669608
																										Cochliobolus heterostrophus C4	P	26.4784	-8.7431	0.56233	22.0496	-10.8751	2.81007	-2.4747	2.66313	1.45863	-6.44339	1.42714	-0.20954	2.04923	1.08713	-1.16928	1.93642
																										Cochliobolus heterstrophus C5	P	31.2946	-8.6195	0.882288	23.8477	-11.6321	2.51888	-3.52573	1.90551	3.02447	-7.23127	1.76869	1.1343	2.86125	0.147928	-1.40333	0.380964
																										Cochliobolus miyabeanus	P	23.1954	-7.57563	2.163	19.0959	-7.94631	1.27802	-3.77788	2.01163	1.10645	-7.40693	2.69649	1.88748	1.44264	0.720436	2.01234	-1.7563
																										Cochliobolus sativus	p	22.6286	-8.08286	0.583671	21.8184	-6.88817	2.2546	-1.56202	2.45161	0.684962	-4.24363	2.84101	0.874069	1.93626	2.28669	0.0374897	0.786558
																										Cochliobolus victoriae	P	27.2568	-7.89542	1.01752	20.3614	-9.13804	2.56187	-3.727	3.42046	0.897508	-5.28096	2.17119	0.401241	3.06174	1.01277	-0.104797	1.49354
																										Pyrenophora teres teres	P	15.7888	-8.65049	1.0767	17.6548	-6.79423	-1.16463	-6.50493	2.70555	2.44284	-9.48987	1.22751	0.972569	0.798393	-1.48916	3.96905	-3.98796
																										Parastagonospora nodorum	P	23.5649	-8.73601	0.734638	18.5125	-8.49161	0.363402	-7.53263	6.07557	0.7794	-5.62734	1.97296	1.89319	-0.503456	-2.00329	3.53691	-4.31379
																										Pyrenophora tritici-repentis	P	13.616	-9.65963	2.65863	16.347	-8.27802	-2.77699	-5.75212	2.15146	2.70793	-6.23361	0.16184	0.548279	-3.09919	-3.01395	5.37061	-4.65837
																										Aspergillus nidulans	P	19.5932	-2.08754	-9.96227	7.31412	-3.37828	-3.45427	-4.44413	3.87424	2.77428	10.563	-4.75758	-1.43784	3.59983	-1.0415	-3.16288	3.9119
																										Trametes versicolor	P	14.149	-9.38238	14.1968	-25.4407	3.32597	13.2445	4.44518	-3.03782	-8.60248	0.931655	2.5249	1.9218	6.90888	14.7091	9.89605	0.453261
																										Trichoderma virens	P	28.9763	-7.96791	-8.37486	2.64406	8.72631	14.3462	-0.175817	0.120003	4.69859	15.2256	-3.38317	-2.19992	16.9584	-10.3356	-10.5946	-1.24032
																										Verticillium albo-atrum	P	5.3194	0.094487	10.6447	15.3787	10.0055	-4.87892	0.0152688	-3.83398	0.329187	8.01751	-5.20614	5.23443	-8.6814	4.50967	2.70738	-5.77715
																										Verticillium dahliae	P	14.3783	-2.99669	14.2045	16.5649	13.7181	-3.21358	-1.965	-2.8747	-1.36944	6.34337	-2.35758	3.82545	-5.06559	2.01284	5.0134	-6.97763
																										Piriformospora indica	S	-7.68717	-11.7243	48.4264	6.75688	40.6507	14.9126	-3.43579	14.0928	2.59723	-4.05605	4.72654	-14.1465	-3.85454	-1.63343	-4.48445	2.32125
																										Sebacina vermifera	S	-4.88243	-14.8759	50.5927	5.92732	28.1675	9.31286	1.27676	11.6366	1.90393	-8.59911	7.14906	-11.619	-6.37971	-2.15395	0.188259	0.930564
																										Moniliophthora perniciosa	S	-25.533	-17.4967	14.1602	-4.86297	-13.2057	-4.59346	1.58858	7.92591	-1.58635	8.21226	-2.85826	-8.10898	-1.85435	2.95921	1.90043	-3.47374
																										Heterobasidion annosum	S	-1.20535	-11.8873	14.6918	-18.7347	-7.95655	7.47206	-3.12665	5.41991	1.24365	0.934819	-4.78832	-4.27136	-2.16249	4.15228	1.432	-0.183994
																										Agaricus bisporus	S	-6.4572	-14.7675	19.0057	-19.4808	-4.99258	2.74906	1.93101	5.2911	1.12491	-2.74445	0.403686	-2.02026	2.02558	-0.530889	-4.45033	0.662686
																										Leptosphaeria maculans	S/Me/P	-9.72174	-5.98438	38.9033	-2.78326	9.01555	-21.5304	3.51989	-0.0542226	0.278216	-5.35515	-2.89525	12.4017	6.54788	-0.00382233	1.19322	-2.80518
																										Rhizoctonia solani AG8	S/Me/P	-9.72174	-5.98438	38.9033	-2.78326	9.01555	-21.5304	3.51989	-0.0542226	0.278216	-5.35515	-2.89525	12.4017	6.54788	-0.00382233	1.19322	-2.80518
																										Serpula lacrymans	S/Mo	-10.2769	-7.67796	-3.51776	-19.6758	5.61094	-0.325779	-1.94588	7.60831	1.72259	-1.8006	-0.760785	-0.291167	6.34421	5.20395	1.61838	1.94547
																										Oidiodendron maius	V	91.1961	12.3773	-15.8357	-23.0946	19.9341	13.885	-21.0728	-1.07857	26.2633	10.7437	4.41054	7.80894	14.4435	-1.07289	8.17589	-11.6478
																										Colletotrichum gloeosporioides	V	96.2463	4.39241	1.75753	7.11613	-8.30631	-11.3856	-5.62748	3.80957	-1.96338	18.0467	-5.29605	1.33202	-4.36617	0.021724	0.195903	7.20961
																										Fusarium avenaceae	V	59.1925	4.28228	-13.2249	3.02753	5.36165	-4.27476	4.11479	4.85007	-11.7479	5.59721	-1.16543	-2.7038	3.99906	-2.12192	-6.74416	-1.5486
																										Fusarium fujikuroi	V	59.853	6.73239	-18.1522	-11.4647	3.91861	-1.963	-6.46013	7.64759	-6.79791	-4.64099	5.30024	0.643351	-0.801733	1.37044	-2.37696	-3.95214
																										Fusarium oxysporum fsp lycopersici	V	73.1448	7.0829	-16.6856	-4.13009	3.30704	-6.12827	1.1617	-1.76941	-11.9722	3.16756	-3.5555	0.407413	-1.99514	-2.44972	2.15081	-2.49767
																										Fusarium verticilliodes	V	45.865	3.51958	-13.296	-1.45203	6.20888	-1.78435	3.03594	3.8619	-7.22258	-0.389515	1.58839	-1.49745	-1.80543	2.31151	-3.72573	-0.313447
																										Fusarium solani	V	88.2743	13.3245	-26.1385	-12.8893	5.56232	-3.99045	-5.36872	12.8355	-6.92433	10.0271	-0.800885	2.12587	4.9225	3.26126	-6.16716	-0.28361
																										Fusarium oxysporum fsp cubense race 1	V	67.3531	8.39218	-17.7256	-12.3992	8.25977	-7.12505	0.328964	0.536818	-11.6137	1.23631	0.858619	-1.26117	-3.56926	0.20833	1.52255	-2.87463
																										Fusarium oxysporum fsp cubense race 4	V	58.2354	5.86848	-13.0042	-6.24548	7.41607	-5.83669	-3.62021	1.43799	-11.5624	-1.8382	1.12678	0.0663691	-3.47577	1.49545	3.16488	-3.75071
																										Fusarium oxysporum fsp cubense tropical race 4	V	90.8808	13.6983	-20.0782	-14.0909	10.3759	-2.23183	1.33153	-0.273952	-8.0062	-11.4695	0.569862	-1.17116	-8.38611	-3.45719	6.79729	-0.650085
																										Fusarium oxysporum fsp melonis	V	111.829	18.2225	-29.0488	-12.8605	8.96812	0.26037	8.31121	-3.04074	-11.028	-8.87101	-1.59192	-0.575937	-3.62551	-2.25391	6.22989	2.39333
																										Fusarium psuedograminearum	V	115.2	14.2558	-11.1791	14.2856	5.88071	3.76381	18.9099	0.876845	-5.78938	-8.74038	4.43955	-5.08472	1.93956	-6.06441	-7.79648	-0.0270483
